# Supplementary material for: Citrullinated Vimentin Presented on MHC-II in Tumor Cells Is a Target for CD4+ T-Cell–Mediated Antitumor Immunity
Source: Oxford University Press journal article supplement (doi:10.1158/0008-5472.can-15-1085), 2016-01-11
Supplement: 00085472can151085-sup-148423_1_supp_3234997_ny221g.docx [file 00085472can151085-sup-148423_1_supp_3234997_ny221g.docx]

**Supplementary Figure legends**

**Figure S1.** Comparison of IFNγ responses induced from double and triple citrullinated vimentin aa28-49 peptides. Splenocytes from mice immunized with triple or double citrullinated vimentin aa28-49 peptides were analyzed for peptide specific responses by IFNγ Elispot assay. *P* values are relative to mice immunized with the triple citrullinated vimentin. Results are representative of at least two independent experiments in which *n* = 3.

**Figure S2.** IFNγ responses induced from citrullinated murine vimentin aa415-433 peptide. Splenocytes from mice immunized with citrullinated murine vimentin aa415-433 peptide were analyzed for peptide-specific responses to murine and human citrullinated and wild type peptides in IFNγ Elispot assay. Results are representative of at least two independent experiments in which *n* = 3.

**Figure S3.** Citrullinated peptide specifc responses are not CD8 mediated. Splenocytes from mice immunized with citrullinated murine vimentin aa415-433 and aa28-49 peptide were analyzed for peptide-specific responses to citrullinated peptides pre and post CD8 depletion in IFNγ Elispot assay.
